# Supplementary material
Source: PubMed Central journal article supplement (PMC11156287)
Supplement: NEJMoa2309003_appendix.pdf [file NEJMoa2309003_appendix.pdf]

## Supplementary Appendix

Supplement to: Hammond J, Fountaine RJ, Yunis C, et al. Nirmatrelvir for vaccinated or unvaccinated adult outpatients with Covid-19. *N Engl J Med* 2024;390:1186-95. DOI: 10.1056/NEJMoa2309003

This appendix has been provided by the authors to give readers additional information about the work.

## Supplementary Appendix

|                                                                                                                                                                                                                           |    |
|---------------------------------------------------------------------------------------------------------------------------------------------------------------------------------------------------------------------------|----|
| List of Investigators .....                                                                                                                                                                                               | 2  |
| Additional Eligibility Criteria .....                                                                                                                                                                                     | 7  |
| Study Product and Blinding .....                                                                                                                                                                                          | 8  |
| Ethical Conduct.....                                                                                                                                                                                                      | 8  |
| Study Drug Responsibilities .....                                                                                                                                                                                         | 8  |
| Nirmatrelvir and matching placebo were manufactured by Pfizer, while ritonavir tablets were manufactured and tested by Hetero Labs Limited (Hyderabad, India) and blinding was done by Pfizer via over-encapsulation..... | 8  |
| Table S1. Signs and Symptoms Attributable to Covid-19 .....                                                                                                                                                               | 9  |
| Table S2. Demographic and Clinical Characteristics of Participants Included in the Full Analysis Set* .....                                                                                                               | 10 |
| Table S3. Representativeness of Study Population.....                                                                                                                                                                     | 12 |
| Table S4. Analysis of Covid-19–Related Hospitalization or Death by Subgroup of Vaccination Status* .....                                                                                                                  | 13 |
| Table S5. Treatment-Emergent Grade 3, 4, and 5 Adverse Events by System Organ Class and Preferred Term (All Causalities; Safety Analysis Population*)† .....                                                              | 15 |
| Table S6. Treatment-Related Treatment-Emergent Grade 3, 4, and 5 Adverse Events by System Organ Class and Preferred Term (Safety Analysis Population*)†.....                                                              | 17 |
| Table S7. Treatment-Emergent Serious Adverse Events by System Organ Class and Preferred Term (All Causalities; Safety Analysis Population*)† .....                                                                        | 18 |

## List of Investigators

| Name                                    | Institute                                                                                                                                                      | Location                                                            |
|-----------------------------------------|----------------------------------------------------------------------------------------------------------------------------------------------------------------|---------------------------------------------------------------------|
| Aazami, Hessam                          | Hope Clinical Research<br>Hope Clinical Research (COVID Satellite Site)                                                                                        | Canoga Park, CA, USA<br>West Hills, CA, USA                         |
| Abinante, Matthew                       | Ascada Research                                                                                                                                                | Fullerton, CA, USA                                                  |
| Abrishamian, Luis                       | South Bay Clinical Research Institute                                                                                                                          | Redondo Beach, CA, USA                                              |
| Akhan, Sila                             | Kocaeli University Medical Faculty                                                                                                                             | Kocaeli, Turkey                                                     |
| Aksoy, Firdevs                          | Karadeniz Teknik Universitesi Farabi                                                                                                                           | Trabzon, Turkey                                                     |
| Al Barwani, Aalia                       | Trio Clinical Trials                                                                                                                                           | Houston, TX, USA                                                    |
| Alexander, Samuel                       | Southern Clinical Research Associates                                                                                                                          | Metairie, LA, USA                                                   |
| Álvarez, Tomás                          | Instituto Médico de la Fundación Estudios Clínicos<br>(Fundación Estudios Clínicos)                                                                            | Rosario, Argentina                                                  |
| Anderson, Duane                         | Excel Clinical Research                                                                                                                                        | Las Vegas, NV, USA                                                  |
| Antila, Martti                          | Clinica de Alergia Martti Antila                                                                                                                               | Sorocaba, Brazil                                                    |
| Antonov, Chavdar                        | MHAT Sveti Nikolay Chudotvoretz                                                                                                                                | Lom, Bulgaria                                                       |
| Avihingsanon, Anchalee                  | Bangkok Centre Hotel<br>Thai Red Cross Emerging Infectious Diseases (EDI) Clinic<br>The HIV Netherlands Australia Thailand Research<br>Collaboration (HIV-NAT) | Bangrak, Thailand<br>Pathumwan, Thailand<br>Pathumwan, Thailand     |
| Ayesu, Kwabena                          | Omega Research Orlando<br>Omega Research Orlando                                                                                                               | Orlando, FL, USA<br>Debary, FL, USA                                 |
| Balik, Ismail                           | Ankara University Medical Faculty, Ibni-Sina Hospital                                                                                                          | Ankara, Turkey                                                      |
| Barrat Hernández, Alejandro             | FAICIC Clinical Research                                                                                                                                       | Veracruz, Mexico                                                    |
| Batista de Moura Xavier de Moraes, João | Hospital Agamenon Mãgalhaes                                                                                                                                    | Recife, Brazil                                                      |
| Benitez, Omar                           | South Florida Research Center                                                                                                                                  | Miami, FL, USA                                                      |
| Benitez, Wilfrido                       | Eastern Research                                                                                                                                               | Hialeah, FL, USA                                                    |
| Berenfus, Vadym                         | Lviv City Clinic Hospital No.4                                                                                                                                 | Lviv, Ukraine                                                       |
| Boghara, Haresh                         | Epic Medical Research                                                                                                                                          | Red Oak, TX, USA                                                    |
| Brabham, David                          | PharmaTex Research                                                                                                                                             | Amarillo, TX, USA                                                   |
| Buchvarov, Mladen                       | Outpatient Clinic for Primary Outpatient Medical Care<br>“Puls”                                                                                                | Tsarevo, Bulgaria                                                   |
| Buendia Magaña, Ruben                   | Eme Red Hospitalaria                                                                                                                                           | Mérida, Mexico                                                      |
| Buendia Suárez, Isabel                  | Instituto de Investigaciones Clínicas para la Salud                                                                                                            | Durango, Mexico                                                     |
| Caeiro, Juan                            | Hospital Privado Centro Médico de Córdoba                                                                                                                      | Córdoba, Argentina                                                  |
| Calinescu, Cornell                      | Matrix Mobile Health Clinic #49, #35, and #62                                                                                                                  | Scottsdale, AZ, USA                                                 |
| Cannon, Kevin                           | Accellacare                                                                                                                                                    | Wilmington, NC, USA                                                 |
| Capote, Eddy                            | Herco Medical and Research Center                                                                                                                              | Coral Gables, FL, USA                                               |
| Caruntu, Florin                         | Delta Health Care                                                                                                                                              | Bucuresti, Romania                                                  |
| Cavalcante, Adilson                     | CEMEC – Centro Multidisciplinar de Estudos Clínicos                                                                                                            | São Paulo, Brazil                                                   |
| Chang, Li Cheng                         | Klinik Kesihatan Kuang                                                                                                                                         | Rawang, Malaysia                                                    |
| Chayakulkeeree, Methee                  | Baiyoke Suite Hotel<br>Riverside Bangkok Hotel<br>Siriraj Hospital, Mahidol University                                                                         | Ratchathewi, Thailand<br>Bangplud, Thailand<br>BangkokNoi, Thailand |
| Cheah, Wee Kooi                         | Hospital Taiping                                                                                                                                               | Taiping, Malaysia                                                   |
| Chusri, Sarunyou                        | Prince of Songkla University, Songklanagarind Hospital                                                                                                         | Hat Yai, Thailand                                                   |

---

|                               |                                                                                          |                                      |
|-------------------------------|------------------------------------------------------------------------------------------|--------------------------------------|
| Cibik, Viliam                 | MUDr. Viliam Cibik, PhD.                                                                 | Pruske, Slovakia                     |
| Cortes, Anais                 | Inpatient Research Clinic                                                                | Hialeah, FL, USA                     |
| Curbelo Calleiro, Maria       | I.V.A.M. Clinical & Investigational Center                                               | Miami, FL, USA                       |
| Czerech, Ewa                  | KLIMED Marek Klimkiewicz                                                                 | Bialystok, Poland                    |
| De La Vega, Dagoberto         | Unlimited Medical Research Group                                                         | Hialeah Gardens, FL, USA             |
| Del Carpio Orantes, Luis      | Sociedad de Metabolismo y Corazon                                                        | Veracruz, Mexico                     |
| Deno, Yohanna                 | CDC Research Institute                                                                   | Port Saint Lucie, FL, USA            |
| Diaz, Jorge                   | Doral Medical Research                                                                   | Hialeah, FL, USA                     |
| Dobreva, Vanya                | DCC Sveti Georgi                                                                         | Plovdiv, Bulgaria                    |
| Dombi, Attila                 | Trial Pharma                                                                             | Bekescsaba, Hungary                  |
| Drasnar, Tomáš                | Nemocnice Slaný                                                                          | Slaný, Czech Republic                |
| Duardo-Guerra, Yamirka        | LCC Medical Research Institute                                                           | Miami, FL, USA                       |
| Fakih, Faisal                 | Clinical Site Partners                                                                   | Winter Park, FL, USA                 |
| Fam, Tem Lom                  | Hospital Miri                                                                            | Miri, Malaysia                       |
| Fatakia, Adil                 | New Orleans Sinus Center (COVID-19 Testing)<br>Tandem Clinical Research GI               | Marrero, LA, USA<br>Marrero, LA, USA |
| Fernandez-Miro, Humberto      | Global Health Clinical Trials                                                            | Miami, FL, USA                       |
| Flores Figueroa, Jose         | JM Research                                                                              | Cuernavaca, Mexico                   |
| Fonseca, Alex                 | CECOR – Centro Oncológico de Roraima                                                     | Boa Vista, Brazil                    |
| Fulat, Muhammed Ameen         | Clinical Trial Systems                                                                   | Pretoria, South Africa               |
| Galitz, Lawrence              | GCP, Global Clinical Professionals                                                       | St. Petersburg, FL, USA              |
| Garcia, Lazaro                | Entrust Clinical Research                                                                | Miami, FL, USA                       |
| Gavrylov, Anatoliy            | Regional Clinical Infectious Diseases Hospital                                           | Kharkiv, Ukraine                     |
| Geldenhuis, Johan             | FCRN Clinical Trial Centre                                                               | Vereeniging, South Africa            |
| Georgiev, Emil                | Diagnostic-Consultative Center I – Lom                                                   | Lom, Bulgaria                        |
| Georgieva, Stela              | MHAT Targovishte                                                                         | Targovishte, Bulgaria                |
| Gorgos, Linda                 | AXCES Research Group                                                                     | Sante Fe, NM, USA                    |
| Gudzheva, Rummyana Gavrailova | Diagnostic-Consultative Center XXII – Sofia                                              | Sofia, Bulgaria                      |
| Gunduz, Alper                 | Basaksehir Cam ve Sakura Sehir Hastanesi                                                 | Istanbul, Turkey                     |
| Haracherova, Kameliya         | Specialized Hospital for Active Treatment in Pulmonology and Phthysiology – Stara Zagora | Stara Zagora, Bulgaria               |
| Harcza, Eleonora              | Agria-Study                                                                              | Eger, Hungary                        |
| Hassler, Shawn                | Optimus Medical Group                                                                    | San Francisco, CA, USA               |
| Haytova, Nezabravka           | Specialized Hospital for Active Treatment of Pneumo-Phthysiatric Diseases – Vratsa       | Vratsa, Bulgaria                     |
| Hellstrom, Elizabeth          | Be Part Research                                                                         | Paarl, South Africa                  |
| Hernández Pichardo, Joselito  | Asociación Mexicana para la Investigación Clínica                                        | Pachuca de Soto, Mexico              |
| Hernandez, Manuel             | Savin Medical Group                                                                      | Miami Lakes, FL, USA                 |
| Hoosen, Farzana               | Synapta Clinical Research Center                                                         | Durban, South Africa                 |
| Hrebenar, Slavomir            | Plucna ambulancia Hrebenar                                                               | Spisska Nova Ves, Slovakia           |
| Hristova, Iskra               | Medical Center Leo Clinic                                                                | Varna, Bulgaria                      |

---

---

|                                                     |                                                                                     |                                       |
|-----------------------------------------------------|-------------------------------------------------------------------------------------|---------------------------------------|
| Hristovski, Boyan                                   | MHAT St. Sofia                                                                      | Sofia, Bulgaria                       |
| Hussen, Nazreen                                     | Worthwhile Clinical Trials                                                          | Benoni, South Africa                  |
| Igbinador, Awawu                                    | Monroe Biomedical Research                                                          | Monroe, NC, USA                       |
| Ilashchuk, Tetiana                                  | City Clinical Hospital No.3 of Chernivtsi City Council                              | Chernivtsi, Ukraine                   |
| Imura, Haruki                                       | Rakuwakai Otowa Hospital                                                            | Kyoto-shi, Japan                      |
| Inan, Dilara                                        | Akdeniz Universitesi Hastanesi                                                      | Antalya, Turkey                       |
| Issa, Husam                                         | Tranquility Research                                                                | Webster, TX, USA                      |
| Jandali, Imad                                       | Asclepes Research Centers                                                           | Spring Hill, FL, USA<br>Lutz, FL, USA |
| Jeudy, Wilner                                       | Next Level Urgent Care                                                              | Houston, TX, USA                      |
| Jimenez, Mario                                      | Kendall South Medical Center                                                        | Miami, FL, USA                        |
| Kalfov, Veselin                                     | Specialized Hospital for Active Treatment of Pneumo-Phthisiatric Diseases – Haskovo | Haskovo, Bulgaria                     |
| Kandemir, Fatma                                     | Mersin University Medical Faculty                                                   | Mersin, Turkey                        |
| Kang, Seung ji                                      | Chonnam National University Bitgoeul Hospital                                       | Gwangju, Republic of Korea            |
| Karabay, Oguz                                       | Sakarya University Training and Research Hospital                                   | Sakarya, Turkey                       |
| Karaoglan, Ilkay                                    | Gaziantep Universitesi Tip Fakultesi Sahinbey Uygulama ve Arastirma Hastanesi       | Gaziantep, Turkey                     |
| Karpenko, Olena                                     | Kyiv City Clinical Hospital No.1                                                    | Kyiv, Ukraine                         |
| Killion, Jennifer                                   | Accellacare                                                                         | Ames, IA, USA                         |
| Kim, Kenneth                                        | Ark Clinical Research                                                               | Long Beach, CA, USA                   |
| Kirov, Mihail                                       | Medical Centre Leo Clinic                                                           | Lovech, Bulgaria                      |
| Kobrynska, Olena                                    | Central City Clinical Hospital of Ivano-Frankivsk City Council                      | Ivano-Frankivsk, Ukraine              |
| Kohli, Anita                                        | Arizona Clinical Trials                                                             | Tuscon, AZ, USA                       |
| Koksal, Iftihar                                     | Acibadem University Atakent Hospital                                                | Istanbul, Turkey                      |
| Kolář, Jan                                          | Zdraví-Fit                                                                          | Protivín, Czech Republic              |
| Komitov, Iliyan                                     | MHAT – Sliven to Military Medical Academy                                           | Sliven, Bulgaria                      |
| Koval, Tetiana                                      | Poltava Regional Clinical Infectious Diseases Hospital                              | Poltava, Ukraine                      |
| Kovalenko, Svitlana                                 | Chernivtsi Regional Clinical Hospital                                               | Chernivtsi, Ukraine                   |
| Laningham, Robert                                   | Conroe Willis Medical Research                                                      | Conroe, TX, USA                       |
| Lima, Maria Patelli                                 | Hospital e Maternidade Celso Pierro – PUC Campinas                                  | Campinas, Brazil                      |
| Lima, Marina                                        | Hospital Dia do Pulmao                                                              | Blumenau, Brazil                      |
| Lodyga, Michal<br>(previously Kierkus,<br>Jaroslaw) | WIP Warsaw IBD Point Profesor Kierkus                                               | Warszawa, Poland                      |
| Logoida, Pavlo                                      | Polyclinic of Center for Medical Services and Rehabilitation                        | Kyiv, Ukraine                         |
| Lopes, Suzara                                       | Chronos Pesquisa Clinica                                                            | Brasilia, Brazil                      |
| López Romo, Alicia                                  | Christus – Latam Hub Center of Excellence and Innovation Center                     | Monterrey, Mexico                     |
| Luz, Kleber                                         | Centro de Estudos e Pesquisas em Moléstias Infecciosas                              | Natal, Brazil                         |
| Mabale, Primrose                                    | Reimed Vosloorus                                                                    | Boksburg, South Africa                |
| Macias, Francisco                                   | USPA Advance Concept Medical Research Group                                         | South Miami, FL, USA                  |
| Macias, Pablo                                       | Clinical Research Institute Saltillo                                                | Saltillo, Mexico                      |
| Mannheimer, Sharon                                  | NYC Health + Hospitals/Harlem                                                       | New York, NY, USA                     |
| Martin Quiros,<br>Alejandro                         | Hospital Universitario de la Paz                                                    | Madrid, Spain                         |

---

|                                                                      |                                                                                                           |                                              |
|----------------------------------------------------------------------|-----------------------------------------------------------------------------------------------------------|----------------------------------------------|
| Martinez, Cindy                                                      | Premium Medical Research                                                                                  | Miami, FL, USA                               |
| Martinez, Orvil                                                      | Advance Medical Research Center                                                                           | San Juan, Puerto Rico                        |
| Mas, Luis                                                            | Advance Clinical Research Group                                                                           | Cutler Bay, FL, USA                          |
| McHarry, Kirsten                                                     | TASK Eden                                                                                                 | George, South Africa                         |
| McKinnell, James                                                     | Lightship                                                                                                 | El Segundo, CA, USA                          |
| Merchante, Nicolas                                                   | Hospital Universitario Virgen de Valme                                                                    | Sevilla, Spain                               |
| Merkely, Béla                                                        | Semmelweis University Varosmajori Sziv es Ergyogyaszati<br>Klinika                                        | Budapest, Hungary                            |
| Mert, Ali                                                            | Medipol Mega University Hospital                                                                          | Istanbul, Turkey                             |
| Metev, Hristo                                                        | Specialized Hospital for Active Treatment of Pneumo-<br>Physiatric Diseases Dr. Dimitar Gramatikov – Ruse | Ruse, Bulgaria                               |
| Minova, Lyudmyla                                                     | Oleksandrivska Kyiv City Clinical Hospital                                                                | Kyiv, Ukraine                                |
| Mir Remedios, Ariel                                                  | C'A Research                                                                                              | Miami, FL, USA                               |
| Mitha, Essack                                                        | Sandton Medical Clinic                                                                                    | Sandton, South Africa                        |
| Mitreva, Roza                                                        | MHAT – Samokov                                                                                            | Samokov, Bulgaria                            |
| Mogashoa, Salphy                                                     | Botho Ke Bontle Health Services                                                                           | Pretoria, South Africa                       |
| Monlux, George                                                       | MOORE Clinical Research                                                                                   | Brandon, FL, USA                             |
| Moosa, Naeem                                                         | Lenasia Clinical Trial Centre                                                                             | Johannesburg, South Africa                   |
| Mootsikapun, Piroon                                                  | Khon Kaen University Field Hospital<br>Srinagarind Hospital                                               | Khon Kaen, Thailand<br>Khon Kaen, Thailand   |
| Moroz, Larysa                                                        | Vinnytsia City Clinical Hospital No.1                                                                     | Vinnytsia, Ukraine                           |
| Mustafa, Mahiran                                                     | Hospital Raja Perempuan Zainab II                                                                         | Kota Bharu, Malaysia                         |
| Nagasaki, Yoji                                                       | Kyushu Medical Center                                                                                     | Fukuoka-shi, Japan                           |
| Napora, Piotr                                                        | Centrum Badań Klinicznych Piotr Napora                                                                    | Wrocław, Poland                              |
| Narejos Perez, Silvia                                                | EBA Centelles                                                                                             | Centelles, Spain                             |
| Nazir, Jawad                                                         | Avera McKennan Hospital & University Health Center<br>Avera Research Institute                            | Sioux Falls, SD, USA<br>Sioux Falls, SD, USA |
| Nemechkin, Oleg                                                      | MHAT Sveti Ivan Rilski – Razgrad                                                                          | Razgrad, Bulgaria                            |
| Newman Lobato Souza,<br>Tâmara                                       | Instituto de Infectologia Emílio Ribas                                                                    | São Paulo, Brazil                            |
| Ngcakani, Nomangesi                                                  | Global Clinical Trials                                                                                    | Gqeberha, South Africa                       |
| Nieradko-Iwanic<br>Ka, Barbara<br>(previously Blicharski,<br>Tomasz) | Tomasz Blicharski Lubelskie Centrum Diagnostyczne                                                         | Swidnik, Poland                              |
| Nuñez, Juan                                                          | Clinica Mayo Urgencias Medicas Cruz Blanca                                                                | San Miguel de Tucuman,<br>Argentina          |
| Oshita, Masaru                                                       | Benchmark Research                                                                                        | Sacramento, CA, USA                          |
| Ostrovskyy, Mykola                                                   | Ivano-Frankivsk Regional Phthisiopulmonology Center of<br>Ivano-Frankivsk Regional Council                | Ivano-Frankivsk, Ukraine                     |
| Paluga, Igor                                                         | ALERGIA                                                                                                   | Topolcany, Slovakia                          |
| Panayotov, Plamen                                                    | Individual Practice for Primary Medical Care – Dr. P.<br>Panayotov                                        | Burgas, Bulgaria                             |
| Paoli-Bruno, Jorge                                                   | Coral Research Clinic                                                                                     | Miami, FL, USA                               |
| Papp, Albert                                                         | Trial Pharma                                                                                              | Gyula, Hungary                               |
| Paredes Deiros, Roger                                                | Hospital Universitari Germans Trias i Pujol                                                               | Badalona, Spain                              |
| Parev, Atanas                                                        | MHAT St. Panteleimon – Plovdiv                                                                            | Plovdiv, Bulgaria                            |
| Park, Sang-Won                                                       | Boramae Medical Center                                                                                    | Seoul, Republic of Korea                     |
| Patel, Bhaktasharan                                                  | Future Innovative Treatments                                                                              | Colorado Springs, CO, USA                    |

---

|                                                  |                                                                           |                              |
|--------------------------------------------------|---------------------------------------------------------------------------|------------------------------|
| Patel, Lisa                                      | Santos Research Center                                                    | Tampa, FL, USA               |
| Penchev, Mladen                                  | Medical Center-1-Sevlievo                                                 | Sevlievo, Bulgaria           |
| Perez Gonzalez, Alexandre                        | Hospital Alvaro Cunqueiro                                                 | Vigo, Spain                  |
| Piñeiro Puebla, Yanely                           | Angels Clinical Research Institute                                        | Miami, FL, USA               |
| Pinheiro, Renata Alexandra                       | IBPClin – Instituto Brasil de Pesquisa Clínica                            | Rio de Janeiro, Brazil       |
| Polat, Gulru                                     | Izmir Suat Seren Chest Disease and Surgery Training and Research Hospital | Izmir, Turkey                |
| Popova, Maya                                     | MOBAL Dr. Stefan Cherkezov                                                | Veliko Tarnovo, Bulgaria     |
| Pryshlyak, Oleksandra                            | Ivano-Frankivsk Regional Clinical Infectious Diseases Hospital            | Ivano-Frankivsk, Ukraine     |
| Pullman, John                                    | Mercury Street Medical Group                                              | Butte, MT, USA               |
| Ramirez Hernandez, Amado                         | Arké SMO                                                                  | Veracruz, Mexico             |
| Ramirez Navarro, Ariel                           | Reed Medical Research                                                     | Miami, FL, USA               |
| Ratvaj, Vlastimil                                | HODOSI – MED                                                              | Moldava nad Bodvou, Slovakia |
| Reyes, Ramon                                     | BFHC Research                                                             | San Antonio, TX, USA         |
| Ribeiro, Maria Pia                               | Instituto Nacional de Infectologia Evandro Chagas                         | Rio de Janeiro, Brazil       |
| Rivera Martínez, Norma                           | Oaxaca Site Management Organization                                       | Oaxaca de Juárez, Mexico     |
| Rosenthal, Mark (previously Krainson, James)     | CSP Miami                                                                 | Miami, FL, USA               |
| Sachdeva, Yessica                                | Arizona Clinical Trials                                                   | Mesa, AZ, USA                |
| Salazar, Hernan                                  | Endeavor Clinical Trials                                                  | San Antonio, TX, USA         |
| Samoilova, Svitlana                              | Kyiv Railway Clinical Hospital No.2                                       | Kyiv, Ukraine                |
| Sánchez Salazar, Sergio                          | Eukarya Pharmasite                                                        | Monterrey, Mexico            |
| Sanchez Vallejo, Gregorio                        | Fundacion Cardiomet CEQUIN                                                | Armenia, Colombia            |
| Sato, Victor                                     | Hospital Alemão Oswaldo Cruz                                              | São Paulo, Brazil            |
| Schneider, Linda                                 | TMPG Clinical Research                                                    | Newport News, VA, USA        |
| Sebastian, Peter                                 | Dr PJ Sebastian Clinical Research Centre                                  | Durban, South Africa         |
| Sekino, Hisakuni                                 | Sekino Hospital                                                           | Toshima-ku, Japan            |
| Shinkai, Masaharu                                | Tokyo Shinagawa Hospital                                                  | Shinagawa-ku, Japan          |
| Siddiqui, Mohammad (previously Mussaji, Murtaza) | LinQ Research                                                             | Pearland, TX, USA            |
| Siegel, Amy                                      | ARC Clinical Research at William Cannon                                   | Austin, TX, USA              |
| Simon Campos, Jesus                              | Köhler & Milstein Research                                                | Mérida, Mexico               |
| Simova, Iana                                     | MHAT Heart and Brain                                                      | Pleven, Bulgaria             |
| Sims, James                                      | St Hope Foundation                                                        | Bellaire, TX, USA            |
| Simsek-Yavuz, Serap                              | Istanbul University Istanbul Medical Faculty                              | Istanbul, Turkey             |
| Skolnick, Alan                                   | SignatureCare Emergency Center                                            | Houston, TX, USA             |
| Sosa Faria, Javier                               | Clinical Research Management Group                                        | Ponce, Puerto Rico           |
| Sousa Regueiro, María Dolores                    | Complejo Hospitalario Universitario da Coruna                             | A Coruña, Spain              |
| Sprinz, Eduardo                                  | Hospital De Clinicas De Porto Alegre                                      | Porto Alegre, Brazil         |
| Suarez, Rosa                                     | ProLive Medical Research                                                  | Miami, FL, USA               |

---

|                         |                                                                          |                                  |
|-------------------------|--------------------------------------------------------------------------|----------------------------------|
| Suleman, Moosa          | Ahmed Al-Kadi Private Hospital                                           | Durban, South Africa             |
| Tabak, Omer             | Istanbul University Cerrahpasa – Cerrahpasa Medical Faculty              | Istanbul, Turkey                 |
| Tasova, Yesim           | Cukurova University Medical Faculty                                      | Balcali, Turkey                  |
| Tiholov, Rumén          | MHAT Sveti Ivan Rilski – Kozloduy                                        | Kozloduy, Bulgaria               |
| Tokunaga, Paula         | Centro de Estudos Clinicos do Interior Paulista (CECIP)                  | São Paulo, Brazil                |
| Tomas, Juan             | Hospital de Clinicas Presidente Nicolas Avellaneda                       | San Miguel de Tucuman, Argentina |
| Tsushima, Kenji         | International University of Health and Welfare Narita Hospital           | Narita-shi, Japan                |
| Ünal, Serhat            | Hacettepe University Medical Faculty Hospital                            | Ankara, Turkey                   |
| Valia Vera, Juan Carlos | IMED Valencia                                                            | Burjassot, Spain                 |
| Vanegas Arias, Ana      | Fundacion Centro de Investigacion Clinica                                | Medellin, Colombia               |
| Varkonyi, Istvan        | Debreceni Egyetem Klinikai Központ                                       | Debrecen, Hungary                |
| Vasquez, Eduardo        | Pro-Care Research Center                                                 | Miami Gardens, FL, USA           |
| Velez, Patricia         | Centro de Investigacion en Reumatologia y Especialidades Medicas         | Bogota, Colombia                 |
| Vico, Marisa            | Instituto de Investigaciones Clinicas Zarate                             | Zárate, Argentina                |
| Victoria, Rafaelito     | Atella Clinical Research                                                 | La Palma, CA, USA                |
| Vyshnyvetsky, Ivan      | Hospital No.1 of Zhytomyr City Council Department of Infectious Diseases | Zhytomyr, Ukraine                |
| Webster, Brian          | Innovo Research–Wilmington Health                                        | Wilmington, NC, USA              |
| Weston, Patrick         | Synergy Healthcare                                                       | Bradenton, FL, USA               |
| Wever, David            | Cahaba Research                                                          | Pelham, AL, USA                  |
| Winnie, Michael         | South Texas Clinical Research                                            | Corpus Christi, TX, USA          |
| Zilahi, Zsolt           | Medifarma-98                                                             | Nyíregyháza, Hungary             |

### Additional Eligibility Criteria

Fertile participants were also required to use a highly effective method of contraception. Participants were excluded if they had  $\geq 1$  predefined, underlying condition associated with increased risk of developing severe Covid-19,<sup>2-5</sup> including age  $\geq 65$  years; body mass index (BMI)  $\geq 30$  kg/m<sup>2</sup>; active smoking; chronic lung, cardiovascular, kidney, or sickle cell disease; hypertension; diabetes; cancer; neurodevelopmental disorders or other medically complex condition; or medical-related technological dependence. Before implementation of protocol amendment 5, a participant had a complete vaccination schedule, the exclusion criterion for comorbidity was invalidated. Other key exclusion criteria included pregnancy or breastfeeding; history of hospitalization for Covid-19; current or anticipated need for hospitalization  $\leq 48$  hours after randomization; confirmed previous infection with SARS-CoV-2; active liver, renal, or HIV disease or concurrent systemic infection; concurrent comorbidity requiring hospitalization/surgery within the previous 7 days or considered life-threatening within the previous 30 days; and known history of certain abnormalities in clinical laboratory testing within 6 months before study screening.

Prohibited prior or concomitant therapies included medications that are highly dependent on CYP3A4 for clearance and may be unsafe at elevated plasma concentrations (during and through 4 days after treatment); strong inducers of CYP3A4 ( $\leq 28$  days before and during treatment); monoclonal antibodies, antivirals, or convalescent Covid-19 plasma for Covid-19 treatment; and Covid-19 vaccines within 12 months of screening (before the Day 34 visit) in all participants except those fully vaccinated at baseline with underlying risk factors for severe Covid-19, as specified above.



### **Study Product and Blinding**

Nirmatrelvir was provided as 150-mg tablets, while ritonavir was provided as 100-mg capsules; each had a matching placebo. Participants were instructed to take 2 tablets and 1 capsule (ie, 300 mg nirmatrelvir and 100 mg ritonavir or matching placebo) every 12 hours for 5 days (ie, 10 doses total). At the end of treatment, participants were followed up until Week 24.

### **Ethical Conduct**

All participants provided written informed consent. The study was conducted in accordance with ethical principles derived from international guidelines including the Declaration of Helsinki, Council for International Organizations of Medical Sciences International Ethical Guidelines, International Council for Harmonization Good Clinical Practice guidelines, and local laws and regulations. The protocol and other relevant documents were approved by an institutional review board/ethics committee before study initiation.

### **Study Drug Responsibilities**

Nirmatrelvir and matching placebo were manufactured by Pfizer, while ritonavir tablets were manufactured and tested by Hetero Labs Limited (Hyderabad, India) and blinding was done by Pfizer via over-encapsulation.

**Table S1. Signs and Symptoms Attributable to Covid-19**

| <b>Daily Sign and Symptom Collection</b>                           | <b>Targeted<br/>(Used for<br/>Study Entry)</b> | <b>Daily Sign and<br/>Symptom<br/>Collection</b> | <b>Targeted<br/>Symptoms for<br/>Analysis</b> |
|--------------------------------------------------------------------|------------------------------------------------|--------------------------------------------------|-----------------------------------------------|
| Cough                                                              | X                                              | X                                                | X                                             |
| Shortness of breath or difficulty breathing                        | X                                              | X                                                | X                                             |
| Fever (documented temperature >38°C [100.4°F]) or feeling feverish | X                                              |                                                  |                                               |
| Feeling feverish                                                   |                                                | X                                                | X                                             |
| Chills or shivering                                                | X                                              | X                                                | X                                             |
| Fatigue                                                            | X                                              | X                                                |                                               |
| Muscle or body aches                                               | X                                              | X                                                | X                                             |
| Diarrhea                                                           | X                                              | X                                                | X                                             |
| Nausea                                                             | X                                              | X                                                | X                                             |
| Vomiting                                                           | X                                              | X                                                | X                                             |
| Headache                                                           | X                                              | X                                                | X                                             |
| Sore throat                                                        | X                                              | X                                                | X                                             |
| Stuffy or runny nose                                               | X                                              | X                                                | X                                             |
| Loss of smell                                                      |                                                | X                                                |                                               |
| Loss of taste                                                      |                                                | X                                                |                                               |

Results from local reverse transcriptase polymerase chain reaction or other molecular tests detecting viral RNA or protein performed within 5 days of randomization or rapid antigen tests performed at screening were used to confirm SARS-CoV-2 infection.

Severity ratings for each symptom over the previous 24 hours used a 4-point scale where: 0=absent, 1=mild, 2=moderate, and 3=severe; vomiting/diarrhea and loss of smell/taste used a 4-point frequency scale and 3-point Likert scale, respectively.

**Table S2. Demographic and Clinical Characteristics of Participants Included in the Full Analysis Set\***

| <b>Characteristic</b>                           | <b>Nirmatrelvir/Ritonavir<br/>(n=658)</b> | <b>Placebo<br/>(n=638)</b> | <b>Total<br/>(N=1296)</b> |
|-------------------------------------------------|-------------------------------------------|----------------------------|---------------------------|
| Sex, n (%)                                      |                                           |                            |                           |
| Male                                            | 312 (47.4)                                | 284 (44.5)                 | 596 (46.0)                |
| Female                                          | 346 (52.6)                                | 354 (55.5)                 | 700 (54.0)                |
| Age, median (range), y                          | 41 (18–87)                                | 42 (18–82)                 | 42 (18–87)                |
| Race, n (%)                                     |                                           |                            |                           |
| White                                           | 515 (78.3)                                | 502 (78.7)                 | 1017 (78.5)               |
| Black or African American                       | 28 (4.3)                                  | 23 (3.6)                   | 51 (3.9)                  |
| Asian                                           | 70 (10.6)                                 | 72 (11.3)                  | 142 (11.0)                |
| American Indian or Alaska Native                | 39 (5.9)                                  | 32 (5.0)                   | 71 (5.5)                  |
| Not reported                                    | 5 (0.8)                                   | 7 (1.1)                    | 12 (0.9)                  |
| Unknown                                         | 1 (0.2)                                   | 2 (0.3)                    | 3 (0.2)                   |
| Ethnicity, n (%)                                |                                           |                            |                           |
| Hispanic or Latino                              | 274 (41.6)                                | 262 (41.1)                 | 536 (41.4)                |
| Not reported                                    | 4 (0.6)                                   | 6 (0.9)                    | 10 (0.8)                  |
| Geographic region, n (%)                        |                                           |                            |                           |
| United States                                   | 216 (32.8)                                | 206 (32.3)                 | 422 (32.6)                |
| Europe                                          | 222 (33.7)                                | 215 (33.7)                 | 437 (33.7)                |
| Rest of world                                   | 220 (33.4)                                | 217 (34.0)                 | 437 (33.7)                |
| BMI, kg/m <sup>2</sup> , median (range)         | 24.91<br>(17.45–58.82)                    | 24.92<br>(14.20–53.14)     | 24.91<br>(14.20–58.82)    |
| Baseline comorbidities, n (%)†                  |                                           |                            |                           |
| Cardiovascular disorders                        | 7 (1.1)                                   | 8 (1.3)                    | 15 (1.2)                  |
| Chronic lung disease                            | 9 (1.4)                                   | 13 (2.0)                   | 22 (1.7)                  |
| Cigarette smoker                                | 86 (13.1)                                 | 86 (13.5)                  | 172 (13.3)                |
| Diabetes mellitus                               | 34 (5.2)                                  | 32 (5.0)                   | 66 (5.1)                  |
| Hypertension                                    | 83 (12.6)                                 | 77 (12.1)                  | 160 (12.3)                |
| Vaccinated, n (%)                               | 374 (56.8)                                | 364 (57.1)                 | 738 (56.9)                |
| Serology status, n (%)                          |                                           |                            |                           |
| Positive‡                                       | 482 (73.3)                                | 475 (74.5)                 | 957 (73.8)                |
| Negative                                        | 161 (24.5)                                | 149 (23.4)                 | 310 (23.9)                |
| Unknown                                         | 15 (2.3)                                  | 14 (2.2)                   | 29 (2.2)                  |
| Viral load, log <sub>10</sub> copies/mL, n (%)§ |                                           |                            |                           |
| 0                                               | 99 (15.0)                                 | 106 (16.6)                 | 205 (15.8)                |
| < 4                                             | 171 (26.0)                                | 188 (29.5)                 | 359 (27.7)                |
| ≥ 4                                             | 474 (72.0)                                | 438 (68.7)                 | 912 (70.4)                |
| ≥ 5                                             | 424 (64.4)                                | 381 (59.7)                 | 805 (62.1)                |
| ≥ 6                                             | 340 (51.7)                                | 302 (47.3)                 | 642 (49.5)                |
| < 7                                             | 433 (65.8)                                | 426 (66.8)                 | 859 (66.3)                |

|                                           |                |                |                |
|-------------------------------------------|----------------|----------------|----------------|
| ≥ 7                                       | 212 (32.2)     | 200 (31.3)     | 412 (31.8)     |
| ≥ 8                                       | 81 (12.3)      | 71 (11.1)      | 152 (11.7)     |
| ≥ 9                                       | 5 (0.8)        | 4 (0.6)        | 9 (0.7)        |
| ≥ 10                                      | 0              | 0              | 0              |
| Mean (SD)                                 | 5.3 (2.8)      | 5.0 (2.8)      | 5.1 (2.8)      |
| Median (range)                            | 6.2 (0.0, 9.5) | 6.0 (0.0, 9.4) | 6.0 (0.0, 9.5) |
| Baseline severity, n (%)                  |                |                |                |
| None                                      | 8 (1.2)        | 11 (1.7)       | 19 (1.5)       |
| Mild                                      | 205 (31.2)     | 178 (27.9)     | 383 (29.6)     |
| Moderate                                  | 308 (46.8)     | 307 (48.1)     | 615 (47.5)     |
| Severe                                    | 114 (17.3)     | 129 (20.2)     | 243 (18.8)     |
| Duration since first symptom, n (%)       |                |                |                |
| ≤3 days                                   | 476 (72.3)     | 464 (72.7)     | 940 (72.5)     |
| >3 days                                   | 182 (27.7)     | 174 (27.3)     | 356 (27.5)     |
| Median (range)                            | 3 (0–5)        | 3 (0–6)        | 3 (0–6)        |
| Number of risk factors of interest, n (%) |                |                |                |
| 0                                         | 335 (50.9)     | 314 (49.2)     | 649 (50.1)     |
| 1                                         | 177 (26.9)     | 186 (29.2)     | 363 (28.0)     |
| 2                                         | 95 (14.4)      | 84 (13.2)      | 179 (13.8)     |
| 3                                         | 32 (4.9)       | 40 (6.3)       | 72 (5.6)       |
| 4                                         | 18 (2.7)       | 10 (1.6)       | 28 (2.2)       |
| >4                                        | 1 (0.2)        | 4 (0.6)        | 5 (0.4)        |
| Risk status, n (%)                        |                |                |                |
| High risk                                 | 319 (48.5)     | 317 (49.7)     | 636 (49.1)     |
| Standard risk (no risk factors)           | 335 (50.9)     | 314 (49.2)     | 649 (50.1)     |
| Other                                     | 4 (0.6)        | 7 (1.1)        | 11 (0.8)       |
| Most common risk factors¶, n (%)          |                |                |                |
| BMI ≥30 kg/m <sup>2</sup>                 | 109 (16.6)     | 122 (19.1)     | 231 (17.8)     |
| Smoker                                    | 86 (13.1)      | 86 (13.5)      | 172 (13.3)     |
| Hypertension                              | 83 (12.6)      | 77 (12.1)      | 160 (12.3)     |
| Diabetes mellitus                         | 34 (5.2)       | 32 (5.0)       | 66 (5.1)       |
| ≥65 years of age                          | 36 (5.5)       | 29 (4.5)       | 65 (5.0)       |

BMI=body mass index; SD=standard deviation.

\*All participants who were randomly assigned to study intervention regardless of whether study intervention was administered. Does not include participants excluded from the analysis (shown in **Figure 1**).

†Presented for comorbidities present in ≥1% of participants overall.

‡Positive serostatus was defined as SARS-CoV-2 anti-N (nucleocapsid) or anti-S (spike) positive.

§Swabs for viral load were tested as previously described.<sup>9</sup>

|Severity for the worst targeted sign/symptom.

¶Occurring in ≥5% of participants in any group.

**Table S3. Representativeness of Study Population**

| <b>Disease Under Investigation</b>       | <b>Covid-19</b>                                                                                                                                                                                                                                                                                                                                                                                                                                                                                                                                                    |
|------------------------------------------|--------------------------------------------------------------------------------------------------------------------------------------------------------------------------------------------------------------------------------------------------------------------------------------------------------------------------------------------------------------------------------------------------------------------------------------------------------------------------------------------------------------------------------------------------------------------|
| Special considerations related to        |                                                                                                                                                                                                                                                                                                                                                                                                                                                                                                                                                                    |
| Sex and gender                           | Covid-19 affects both sexes with similar frequency, although males appear to be at increased risk of progressing to severe disease, with somewhat higher rates of hospitalization and death compared with females. Currently, there is no known data regarding Covid-19 case rates or poor outcomes associated with gender identity.                                                                                                                                                                                                                               |
| Age                                      | Covid-19 affects people of all age groups. Compared with younger populations, older adults are more likely to progress to severe illness from COVID-19, including hospitalization and death. As of August 20, 2022, more than half of US Covid-19–associated hospitalizations were in adults $\geq 65$ years.                                                                                                                                                                                                                                                      |
| Race or ethnicity                        | Covid-19 affects people of all races and ethnicities. In the United States, Black/African American, Hispanic/Latino, and American Indian/Alaska Native individuals have experienced a disproportionate Covid-19 burden, including increased case rates and associated hospitalizations and deaths.                                                                                                                                                                                                                                                                 |
| Geography                                | COVID-19 case, hospitalization, and mortality rates vary globally. The spread of SARS-CoV-2 and outcomes for Covid-19 are affected by the prevalence of risk factors in the population, healthcare infrastructure, treatment availability, vaccination rates, circulating SARS-CoV-2 variants, control strategies, and intervention measures, which vary globally.                                                                                                                                                                                                 |
| Other considerations                     | The secondary attack rate among household contacts of individuals infected with the Omicron variant is estimated to be up to 81%. Infection control guidance for household contacts includes isolation, social distancing, hand washing, and mask wearing, with the effectiveness of these measures dependent on several factors. Currently, postexposure prophylactic treatment for household contacts of SARS-CoV-2–infected individuals is not available, although such an approach is recommended in other infectious disease settings.                        |
| Overall representativeness of this trial | The participants in this trial demonstrated the expected ratio of men to women, with slightly more women than men enrolled. Adult participants $\geq 18$ years of age were enrolled. The median (range) age for study participants was 42 (18–87) years. The majority of participants were White (78.5%); 3.9% of participants were Black/African American. Hispanic/Latino individuals comprised 41.4% of randomized participants in the study. Participants were enrolled at centers globally, with 32.6% enrolled from the United States and 33.7% from Europe. |

**Table S4. Analysis of Covid-19–Related Hospitalization or Death by Subgroup of Vaccination Status\***

| Time to Sustained Alleviation                                          | Overall                    |                      | High Risk <sup>†</sup>     |                      | Standard Risk <sup>‡</sup> |                   |
|------------------------------------------------------------------------|----------------------------|----------------------|----------------------------|----------------------|----------------------------|-------------------|
|                                                                        | Nirmatrelvir/<br>Ritonavir | Placebo              | Nirmatrelvir/<br>Ritonavir | Placebo              | Nirmatrelvir/<br>Ritonavir | Placebo           |
| Number of participants evaluated                                       | 654                        | 634                  | 317                        | 314                  | 333                        | 313               |
| Participants with event, n (%)                                         |                            |                      |                            |                      |                            |                   |
| Participants with Covid-19 hospitalization                             | 5 (0.8)                    | 10 (1.6)             | 3 (0.9)                    | 7 (2.2)              | 2 (0.6)                    | 3 (1.0)           |
| Participants with death                                                | 0                          | 1 (0.2)              | 0                          | 1 (0.3)              | 0                          | 0                 |
| Estimated proportion (95% CI)                                          | 0.77 (0.32, 1.85)          | 1.59 (0.86, 2.93)    | 0.95 (0.31, 2.92)          | 2.25 (1.08, 4.65)    | 0.61 (0.15, 2.41)          | 0.96 (0.31, 2.96) |
| Difference from placebo (95% CI)                                       | −0.81 (−2.00, 0.374)       |                      | −1.29 (−3.26, 0.67)        |                      | −0.36 (−1.73, 1.02)        |                   |
| Relative reduction vs placebo, %                                       | 51.2                       |                      | 57.6                       |                      | 36.9                       |                   |
| Participants with Covid-19–related medical visits <sup>§</sup> , n (%) | 15 (2.3)                   | 25 (3.9)             | 6 (1.9)                    | 17 (5.4)             | 9 (2.7)                    | 7 (2.2)           |
| Total number of medical visits across all participants                 | 24                         | 36                   | 6                          | 26                   | 18                         | 9                 |
| Number of medical visits per day                                       |                            |                      |                            |                      |                            |                   |
| Mean (SD)                                                              | 0.001 (0.011)              | 0.002 (0.016)        | 0.001 (0.004)              | 0.003 (0.022)        | 0.0019 (0.015)             | 0.0008 (0.006)    |
| LS mean (95% CI)                                                       | 0.001 (0.001, 0.002)       | 0.002 (0.001, 0.004) | 0.001 (0.000, 0.003)       | 0.003 (0.001, 0.013) | 0                          | 0                 |
| Versus placebo                                                         |                            |                      |                            |                      |                            |                   |
| LS mean ratio (95% CI)                                                 | 0.50 (0.22, 1.13)          |                      | 0.18 (0.06, 0.56)          |                      | 1.49 (0.43, 5.12)          |                   |
| Duration of hospitalization visits, d                                  |                            |                      |                            |                      |                            |                   |
| Mean (SD)                                                              | 0.05 (0.59)                | 0.18 (1.79)          | 0.06 (0.65)                | 0.29 (2.40)          | 0.04 (0.54)                | 0.08 (0.83)       |
| Median (range)                                                         | 0 (0, 9)                   | 0 (0, 32)            | 0 (0, 9)                   | 0 (0, 32)            | 0 (0, 9)                   | 0 (0, 10)         |
| Difference from placebo <sup>  </sup>                                  | −0.13                      |                      | −0.23                      |                      | −0.04                      |                   |

|                               |              |             |              |             |             |              |
|-------------------------------|--------------|-------------|--------------|-------------|-------------|--------------|
| 95% CI of difference**        | -0.22, -0.03 |             | -0.39, -0.04 |             | -0.11, 0.03 |              |
| Duration of ICU visits, days  | 0            | 0.07 (1.00) | 0            | 0.10 (1.31) | 0           | 0.032 (0.57) |
| Mean (SD)                     | 0            | 0 (0-21)    | 0            | 0 (0-21)    | 0           | 0 (0, 10)    |
| Median (range)                | 0 (0, 9)     | 0 (0, 32)   |              |             |             |              |
| Duration of non-ICU visits, d |              |             |              |             |             |              |
| Mean (SD)                     | 0.05 (0.59)  | 0.12 (1.48) | 0.06 (0.65)  | 0.19 (2.20) | 0.04 (0.54) | 0.05 (0.61)  |
| Median (range)                | 0 (0, 9)     | 0 (0, 32)   | 0 (0, 9)     | 0 (0, 32)   | 0 (0, 9)    | 0 (0, 9)     |

ICU, intensive care unit; LS, least squares.

\*All participants who were randomly assigned to study intervention who took  $\geq 1$  dose of study intervention.

†High-risk participants were vaccinated with  $\geq 1$  risk factor for severe Covid-19.

‡Standard risk participants were vaccinated or unvaccinated with no risk factors for severe Covid-19.

§Medical visits included emergency room, practitioner's office, home healthcare services, urgent care, telephone consultation, outpatient infusion center, other.

|Based on bootstrap method with 100,000 replicates, each replicate is randomly selected (with replacement) from each subgroup of the analysis set.

\*\*The probability that average days spent in hospital is greater in the nirmatrelvir/ritonavir 100 mg group. The two-sided p-value is 2 x the proportion.

**Table S5. Treatment-Emergent Grade 3, 4, and 5 Adverse Events by System Organ Class and Preferred Term (All Causalities; Safety Analysis Population\*)†**

| System Organ Class<br>Preferred Term‡  | Nirmatrelvir/ritonavir<br>(N=654)<br>n (%) |         |         | Placebo<br>(N=634)<br>n (%) |         |         |
|----------------------------------------|--------------------------------------------|---------|---------|-----------------------------|---------|---------|
|                                        | Grade 3                                    | Grade 4 | Grade 5 | Grade 3                     | Grade 4 | Grade 5 |
| Participants with event(s)             | 18 (2.8)                                   | 6 (0.9) | 0       | 19 (3.0)                    | 6 (0.9) | 1 (0.2) |
| Blood and lymphatic system disorders   | 1 (0.2)                                    | 1 (0.2) | 0       | 0                           | 0       | 0       |
| Neutropenia                            | 1 (0.2)                                    | 0       | 0       | 0                           | 0       | 0       |
| Thrombocytopenia                       | 0                                          | 1 (0.2) | 0       | 0                           | 0       | 0       |
| Gastrointestinal disorders             | 0                                          | 0       | 0       | 2 (0.3)                     | 0       | 0       |
| Nausea                                 | 0                                          | 0       | 0       | 1 (0.2)                     | 0       | 0       |
| Vomiting                               | 0                                          | 0       | 0       | 1 (0.2)                     | 0       | 0       |
| Infections and infestations            | 5 (0.8)                                    | 0       | 0       | 7 (1.1)                     | 3 (0.5) | 1 (0.2) |
| Bronchitis                             | 1 (0.2)                                    | 0       | 0       | 0                           | 0       | 0       |
| Covid-19                               | 0                                          | 0       | 0       | 1 (0.2)                     | 0       | 0       |
| Covid-19 pneumonia                     | 3 (0.5)                                    | 0       | 0       | 5 (0.8)                     | 1 (0.2) | 1 (0.2) |
| Pharyngitis                            | 0                                          | 0       | 0       | 1 (0.2)                     | 0       | 0       |
| Pneumonia                              | 1 (0.2)                                    | 0       | 0       | 0                           | 2 (0.3) | 0       |
| Sepsis                                 | 0                                          | 0       | 0       | 0                           | 1 (0.2) | 0       |
| Investigations                         | 8 (1.2)                                    | 4 (0.6) | 0       | 6 (0.9)                     | 2 (0.3) | 0       |
| Alanine aminotransferase increased     | 2 (0.3)                                    | 1 (0.2) | 0       | 0                           | 0       | 0       |
| Aspartate aminotransferase increased   | 2 (0.3)                                    | 0       | 0       | 0                           | 0       | 0       |
| Blood creatine phosphokinase increased | 0                                          | 1 (0.2) | 0       | 1 (0.2)                     | 0       | 0       |
| Blood creatinine increased             | 0                                          | 0       | 0       | 1 (0.2)                     | 0       | 0       |
| Blood fibrinogen decreased             | 1 (0.2)                                    | 0       | 0       | 0                           | 0       | 0       |
| Blood glucose increased                | 2 (0.3)                                    | 0       | 0       | 0                           | 0       | 0       |
| Blood potassium increased              | 1 (0.2)                                    | 0       | 0       | 0                           | 0       | 0       |



|                                                  |         |         |   |         |         |   |
|--------------------------------------------------|---------|---------|---|---------|---------|---|
| Blood pressure increased                         | 1 (0.2) | 0       | 0 | 0       | 0       | 0 |
| Creatinine renal clearance decreased             | 0       | 2 (0.3) | 0 | 3 (0.5) | 2 (0.3) | 0 |
| Glomerular filtration rate decreased             | 1 (0.2) | 0       | 0 | 0       | 0       | 0 |
| Hemoglobin decreased                             | 0       | 0       | 0 | 2 (0.3) | 0       | 0 |
| Hepatic enzyme increased                         | 1 (0.2) | 0       | 0 | 0       | 0       | 0 |
| Metabolism and nutrition disorders               | 3 (0.5) | 1 (0.2) | 0 | 3 (0.5) | 1 (0.2) | 0 |
| Electrolyte imbalance                            | 0       | 1 (0.2) | 0 | 0       | 0       | 0 |
| Hyperglycemia                                    | 1 (0.2) | 0       | 0 | 1 (0.2) | 0       | 0 |
| Hyperkalemia                                     | 2 (0.3) | 0       | 0 | 1 (0.2) | 0       | 0 |
| Hypocalcemia                                     | 0       | 0       | 0 | 0       | 1 (0.2) | 0 |
| Hyponatremia                                     | 0       | 1 (0.2) | 0 | 0       | 0       | 0 |
| Type 2 diabetes mellitus                         | 1 (0.2) | 0       | 0 | 1 (0.2) | 0       | 0 |
| Nervous system disorders                         | 3 (0.5) | 0       | 0 | 0       | 0       | 0 |
| Dysgeusia                                        | 1 (0.2) | 0       | 0 | 0       | 0       | 0 |
| Osmotic demyelination syndrome                   | 1 (0.2) | 0       | 0 | 0       | 0       | 0 |
| Presyncope                                       | 1 (0.2) | 0       | 0 | 0       | 0       | 0 |
| Respiratory, thoracic, and mediastinal disorders | 1 (0.2) | 0       | 0 | 0       | 0       | 0 |
| Respiratory distress                             | 1 (0.2) | 0       | 0 | 0       | 0       | 0 |
| Vascular disorders                               | 0       | 0       | 0 | 2 (0.3) | 0       | 0 |
| Hemodynamic instability                          | 0       | 0       | 0 | 1 (0.2) | 0       | 0 |
| Hypertension                                     | 0       | 0       | 0 | 1 (0.2) | 0       | 0 |

Covid-19=coronavirus disease 2019; Nirmatrelvir/ritonavir=nirmatrelvir 300 mg + ritonavir 100 mg.

\*All patients randomly assigned to study intervention who received  $\geq 1$  dose of study intervention.

†Participants are only counted once per treatment per event. Includes adverse events that started on or prior to Day 34 visit.

‡MedDRA v25.0 coding dictionary applied.

**Table S6. Treatment-Related Treatment-Emergent Grade 3, 4, and 5 Adverse Events by System Organ Class and Preferred Term (Safety Analysis Population\*)†**

| System Organ Class<br>Preferred Term‡  | Nirmatrelvir/ritonavir<br>(N=654)<br>n (%) |         |         | Placebo<br>(N=634)<br>n (%) |         |         |
|----------------------------------------|--------------------------------------------|---------|---------|-----------------------------|---------|---------|
|                                        | Grade 3                                    | Grade 4 | Grade 5 | Grade 3                     | Grade 4 | Grade 5 |
| Participants with event(s)             | 2 (0.3)                                    | 1 (0.2) | 0       | 2 (0.3)                     | 0       | 0       |
| Gastrointestinal disorders             | 0                                          | 0       | 0       | 1 (0.2)                     | 0       | 0       |
| Vomiting                               | 0                                          | 0       | 0       | 1 (0.2)                     | 0       | 0       |
| Investigations                         | 0                                          | 1 (0.2) | 0       | 1 (0.2)                     | 0       | 0       |
| Alanine aminotransferase increased     | 0                                          | 1 (0.2) | 0       | 0                           | 0       | 0       |
| Blood creatine phosphokinase increased | 0                                          | 0       | 0       | 1 (0.2)                     | 0       | 0       |
| Nervous system disorders               | 2 (0.3)                                    | 0       | 0       | 0                           | 0       | 0       |
| Dysgeusia                              | 1 (0.2)                                    | 0       | 0       | 0                           | 0       | 0       |
| Presyncope                             | 1 (0.2)                                    | 0       | 0       | 0                           | 0       | 0       |

Nirmatrelvir/ritonavir=nirmatrelvir 300 mg + ritonavir 100 mg.

\*All patients randomly assigned to study intervention who received  $\geq 1$  dose of study intervention.

†Participants are only counted once per treatment per event. Includes adverse events that started on or prior to Day 34 visit.

‡MedDRA v25.0 coding dictionary applied.

**Table S7. Treatment-Emergent Serious Adverse Events by System Organ Class and Preferred Term (All Causalities; Safety Analysis Population\*)†**

| System Organ Class Preferred Term‡                                        | Nirmatrelvir/ritonavir<br>(N=654)<br>n (%) | Placebo<br>(N=634)<br>n (%) |
|---------------------------------------------------------------------------|--------------------------------------------|-----------------------------|
| Participants with any serious adverse event                               | 8 (1.2)                                    | 12 (1.9)                    |
| Infections and infestations                                               | 5 (0.8)                                    | 11 (1.7)                    |
| Covid-19                                                                  | 0                                          | 1 (0.2)                     |
| Covid-19 pneumonia                                                        | 3 (0.5)                                    | 8 (1.3)                     |
| Pneumonia                                                                 | 1 (0.2)                                    | 2 (0.3)                     |
| Pneumonia aspiration                                                      | 1 (0.2)                                    | 0                           |
| Sepsis                                                                    | 0                                          | 1 (0.2)                     |
| Investigations                                                            | 1 (0.2)                                    | 1 (0.2)                     |
| Creatinine renal clearance decreased                                      | 0                                          | 1 (0.2)                     |
| Hepatic enzyme increased                                                  | 1 (0.2)                                    | 0                           |
| Metabolism and nutrition disorders                                        | 1 (0.2)                                    | 0                           |
| Electrolyte imbalance                                                     | 1 (0.2)                                    | 0                           |
| Neoplasms benign, malignant, and unspecified (including cysts and polyps) | 1 (0.2)                                    | 0                           |
| Colon cancer metastatic                                                   | 1 (0.2)                                    | 0                           |
| Nervous system disorders                                                  | 1 (0.2)                                    | 0                           |
| Osmotic demyelination syndrome                                            | 1 (0.2)                                    | 0                           |
| Respiratory, thoracic, and mediastinal disorders                          | 1 (0.2)                                    | 0                           |
| Respiratory distress                                                      | 1 (0.2)                                    | 0                           |

Covid-19=coronavirus disease 2019; Nirmatrelvir/ritonavir=nirmatrelvir 300 mg + ritonavir 100 mg.

\*All patients randomly assigned to study intervention who received  $\geq 1$  dose of study intervention.

†Participants are only counted once per treatment per event. Includes adverse events that started on or prior to Day 34 visit.

‡MedDRA v25.0 coding dictionary applied.
