# Supplementary material
Source: PubMed Central journal article supplement (PMC11156287)
Supplement: NEJMoa2309003_data-sharing.pdf [file NEJMoa2309003_data-sharing.pdf]

## Data Sharing Statement

Hammond J, Fountaine RJ, Yunis C, et al. Nirmatrelvir for Vaccinated or Unvaccinated Adult Outpatients with Covid-19. N Engl J Med. DOI: 10.1056/NEJMoa2309003.

| Question                                                            | Authors' Response                                                                                                                                                                                                                                                                                                                                                                                                                                |
|---------------------------------------------------------------------|--------------------------------------------------------------------------------------------------------------------------------------------------------------------------------------------------------------------------------------------------------------------------------------------------------------------------------------------------------------------------------------------------------------------------------------------------|
| Will the data collected for your study be made available to others? | Yes                                                                                                                                                                                                                                                                                                                                                                                                                                              |
| Would you like to offer context for your decision?                  | —                                                                                                                                                                                                                                                                                                                                                                                                                                                |
| Which data?                                                         | —                                                                                                                                                                                                                                                                                                                                                                                                                                                |
| Additional information about data                                   | —                                                                                                                                                                                                                                                                                                                                                                                                                                                |
| How or where can the data be obtained?                              | Upon request, and subject to review, Pfizer will provide the data that support the findings of this study. Subject to certain criteria, conditions, and exceptions, Pfizer may also provide access to the related individual de-identified participant data. See <a href="https://www.pfizer.com/science/clinical-trials/trial-data-and-results">https://www.pfizer.com/science/clinical-trials/trial-data-and-results</a> for more information. |
| When will data availability begin?                                  | Upon request, and subject to review.                                                                                                                                                                                                                                                                                                                                                                                                             |
| When will data availability end?                                    | End Date:                                                                                                                                                                                                                                                                                                                                                                                                                                        |
| Will any supporting documents be available?                         | —                                                                                                                                                                                                                                                                                                                                                                                                                                                |
| Which supporting documents?                                         | —                                                                                                                                                                                                                                                                                                                                                                                                                                                |
| Additional information about supporting documents                   | —                                                                                                                                                                                                                                                                                                                                                                                                                                                |
| How or where can supporting documents be obtained?                  | —                                                                                                                                                                                                                                                                                                                                                                                                                                                |
| When will supporting documents availability begin?                  | Beginning Date:                                                                                                                                                                                                                                                                                                                                                                                                                                  |
| When will supporting documents availability end?                    | End Date:                                                                                                                                                                                                                                                                                                                                                                                                                                        |
| To whom will data be available?                                     | —                                                                                                                                                                                                                                                                                                                                                                                                                                                |
| For what type of analysis or purpose?                               | —                                                                                                                                                                                                                                                                                                                                                                                                                                                |
| By what mechanism?                                                  | —                                                                                                                                                                                                                                                                                                                                                                                                                                                |
| Any other restrictions?                                             | —                                                                                                                                                                                                                                                                                                                                                                                                                                                |
| Additional information                                              | —                                                                                                                                                                                                                                                                                                                                                                                                                                                |

This statement was posted on April 4, 2024, at NEJM.org.
