# Supplementary material
Source: PubMed Central journal article supplement (PMC11156287)
Supplement: NEJMoa2309003_disclosures.pdf [file NEJMoa2309003_disclosures.pdf]

Jennifer Hammond

**Discloser Identifier:** 1055620

**Disclosure Purpose:** 23-09003 Hammond

## Summary of Interests

### Company or Organization

| Entity                                                         | Type         | Interest Held By                                         |
|----------------------------------------------------------------|--------------|----------------------------------------------------------|
| Pfizer                                                         | Employment   | Self                                                     |
| <b>Title:</b> Vice President<br><b>Additional Information:</b> |              | <b>Position Description:</b> Head, Antiviral Development |
| Pfizer                                                         | Stock        | Self                                                     |
| <b>Additional Information:</b>                                 |              |                                                          |
| Pfizer                                                         | Stock Option | Self                                                     |
| <b>Additional Information:</b>                                 |              |                                                          |

## Additional Questions

1. **Are there other relationships or activities that readers could perceive to have influenced, or that give the appearance of potentially influencing, what you wrote in the submitted work?**

No.

2. **What is the manuscript title?**

Nirmatrelvir for Vaccinated/Unvaccinated, Outpatient Adults with Covid-19

3. **Are you the corresponding author?**

Yes.

a. **Please list the other authors' names here.**

Robert J. Fountaine, Carla Yunis, Dona Fleishaker, Mary Almas, Weihang Bao, Wayne Wisemandle, Mary Lynn Banieki, Victoria M. Hendrick, J. Abraham Simon-Campos, Veselin Kalfov, Rienk Pijpstra, and James M. Rusnak

## Certification

I certify that the information provided in this disclosure is complete and accurate.

Mary Almas

**Discloser Identifier:** 1145724

**Disclosure Purpose:** 23-09003 Hammond

## Summary of Interests

### Company or Organization

| Entity                                                                          | Type       | Interest Held By                                               |
|---------------------------------------------------------------------------------|------------|----------------------------------------------------------------|
| Pfizer Inc.                                                                     | Employment | Self                                                           |
| <b>Title:</b> Statistician<br><b>Additional Information:</b> Full time employee |            | <b>Position Description:</b> Director of Clinical Statistician |

## Additional Questions

1. **Are there other relationships or activities that readers could perceive to have influenced, or that give the appearance of potentially influencing, what you wrote in the submitted work?**

No.

2. **What is the manuscript title?**

Nirmatrelvir for Vaccinated/Unvaccinated, Outpatient Adults with Covid-19

3. **Are you the corresponding author?**

No.

## Certification

I certify that the information provided in this disclosure is complete and accurate.

Mary Lynn Baniecki

Discloser Identifier: 1057411

Disclosure Purpose: 23-09003 Hammond

## Summary of Interests

### Company or Organization

| Entity                         | Type       | Interest Held By                                                                                |
|--------------------------------|------------|-------------------------------------------------------------------------------------------------|
| Pfizer Inc.                    | Employment | Self                                                                                            |
| <b>Title:</b> Sr. Director     |            | <b>Position Description:</b> Sr. Director of translational medicine, Early Clinical Development |
| <b>Additional Information:</b> |            |                                                                                                 |
| Pfizer Inc.                    | Stock      | Self                                                                                            |
| <b>Additional Information:</b> |            |                                                                                                 |

## Additional Questions

1. **Are there other relationships or activities that readers could perceive to have influenced, or that give the appearance of potentially influencing, what you wrote in the submitted work?**

No.

2. **What is the manuscript title?**

Nirmatrelvir for Vaccinated/Unvaccinated, Outpatient Adults with Covid-1

3. **Are you the corresponding author?**

No.

## Certification

I certify that the information provided in this disclosure is complete and accurate.

Weihsng Bao

**Discloser Identifier:** 702359

**Disclosure Purpose:** 23-09003 Hammond

## Summary of Interests

### Company or Organization

| Entity                                                          | Type       | Interest Held By                        |
|-----------------------------------------------------------------|------------|-----------------------------------------|
| Pfizer                                                          | Employment | Self                                    |
| <b>Title:</b> Senior Director<br><b>Additional Information:</b> |            | <b>Position Description:</b> Statistics |

## Additional Questions

1. **Are there other relationships or activities that readers could perceive to have influenced, or that give the appearance of potentially influencing, what you wrote in the submitted work?**

No.

2. **What is the manuscript title?**

Nirmatrelvir for Vaccinated/Unvaccinated, Outpatient Adults with Covid-19

3. **Are you the corresponding author?**

No.

## Certification

I certify that the information provided in this disclosure is complete and accurate.

Dona Fleishaker

**Discloser Identifier:** 1145721

**Disclosure Purpose:** 23-09003 Hammond

## Summary of Interests

I do not have any interests to disclose at this time.

## Additional Questions

1. **Are there other relationships or activities that readers could perceive to have influenced, or that give the appearance of potentially influencing, what you wrote in the submitted work?**

No.

2. **What is the manuscript title?**

Nirmatrelvir for Vaccinated/Unvaccinated, Outpatient Adults with Covid-19

3. **Are you the corresponding author?**

No.

## Certification

I certify that the information provided in this disclosure is complete and accurate.

Robert Fountaine

Discloser Identifier: 1145778

Disclosure Purpose: 23-09003 Hammond

## Summary of Interests

### Company or Organization

| Entity                                                             | Type         | Interest Held By                                  |
|--------------------------------------------------------------------|--------------|---------------------------------------------------|
| Pfizer Inc.                                                        | Employment   | Self                                              |
| <b>Title:</b> Executive Director<br><b>Additional Information:</b> |              | <b>Position Description:</b> Global Clinical Lead |
| Pfizer Inc.                                                        | Stock        | Self                                              |
| <b>Additional Information:</b>                                     |              |                                                   |
| Pfizer Inc.                                                        | Stock Option | Self                                              |
| <b>Additional Information:</b>                                     |              |                                                   |

## Additional Questions

1. **Are there other relationships or activities that readers could perceive to have influenced, or that give the appearance of potentially influencing, what you wrote in the submitted work?**

No.

2. **What is the manuscript title?**

Nirmatrelvir for Vaccinated/Unvaccinated, Outpatient Adults with Covid-19

3. **Are you the corresponding author?**

No.

## Certification

I certify that the information provided in this disclosure is complete and accurate.

Victoria Hendrick

Discloser Identifier: 1057413

Disclosure Purpose: 23-09003 Hammond

## Summary of Interests

### Company or Organization

| Entity                                                           | Type       | Interest Held By             |
|------------------------------------------------------------------|------------|------------------------------|
| Pfizer                                                           | Employment | Self                         |
| <b>Title:</b> Safety Risk Lead<br><b>Additional Information:</b> |            | <b>Position Description:</b> |
| Pfizer                                                           | Stock      | Self                         |
| <b>Additional Information:</b>                                   |            |                              |

## Additional Questions

1. **Are there other relationships or activities that readers could perceive to have influenced, or that give the appearance of potentially influencing, what you wrote in the submitted work?**

No.

2. **What is the manuscript title?**

Nirmatrelvir for Vaccinated/Unvaccinated, Outpatient Adults with Covid-19

3. **Are you the corresponding author?**

No.

## Certification

I certify that the information provided in this disclosure is complete and accurate.

Veselin Kalfov

**Discloser Identifier:** 1145786

**Disclosure Purpose:** 23-09003 Hammond

## Summary of Interests

I do not have any interests to disclose at this time.

## Additional Questions

1. **Are there other relationships or activities that readers could perceive to have influenced, or that give the appearance of potentially influencing, what you wrote in the submitted work?**

No.

2. **What is the manuscript title?**

Nirmatrelvir for Vaccinated/Unvaccinated, Outpatient Adults with Covid-19

3. **Are you the corresponding author?**

No.

## Certification

I certify that the information provided in this disclosure is complete and accurate.



Rienk Pypstra

Discloser Identifier: 1057418

Disclosure Purpose: 23-09003 Hammond

## Summary of Interests

### Company or Organization

| Entity                                                                                                           | Type       | Interest Held By                                                            |
|------------------------------------------------------------------------------------------------------------------|------------|-----------------------------------------------------------------------------|
| Pfizer Inc.                                                                                                      | Employment | Self                                                                        |
| <b>Title:</b> VP Clinical Development, Infectious Diseases<br><b>Additional Information:</b> full time employed. |            | <b>Position Description:</b> Overseeing a portfolio of development programs |
| Pfizer Inc.                                                                                                      | Stock      | Self                                                                        |
| <b>Additional Information:</b>                                                                                   |            |                                                                             |

## Additional Questions

1. **Are there other relationships or activities that readers could perceive to have influenced, or that give the appearance of potentially influencing, what you wrote in the submitted work?**

No.

2. **What is the manuscript title?**

Nirmatrelvir for Vaccinated/Unvaccinated, Outpatient Adults with Covid-19

3. **Are you the corresponding author?**

No.

## Certification

I certify that the information provided in this disclosure is complete and accurate.

James Rusnak

Discloser Identifier: 1057423

Disclosure Purpose: 23-09003 Hammond

## Summary of Interests

### Company or Organization

| Entity                                                                                                                                                 | Type             | Interest Held By |
|--------------------------------------------------------------------------------------------------------------------------------------------------------|------------------|------------------|
| Pfizer,Inc.                                                                                                                                            | Employment       | Self             |
| <b>Title:</b> SVP, Chief Development Officer, Internal Medicine and Infectious Diseases <b>Position Description:</b><br><b>Additional Information:</b> |                  |                  |
| Pfizer,Inc.                                                                                                                                            | Other Securities | Self             |
| <b>Security Description:</b><br><b>Additional Information:</b>                                                                                         |                  |                  |
| Pfizer,Inc.                                                                                                                                            | Stock            | Self             |
| <b>Additional Information:</b>                                                                                                                         |                  |                  |

## Additional Questions

1. **Are there other relationships or activities that readers could perceive to have influenced, or that give the appearance of potentially influencing, what you wrote in the submitted work?**

No.

2. **What is the manuscript title?**

Nirmatrelvir for Vaccinated/Unvaccinated, Outpatient Adults with Covid-19

3. **Are you the corresponding author?**

No.

## Certification

I certify that the information provided in this disclosure is complete and accurate.

Discloser Identifier: 1018681

Disclosure Purpose: 23-09003 Hammond

## Summary of Interests

### Company or Organization

| Entity                                                                                                                                                                          | Type           | Interest Held By |
|---------------------------------------------------------------------------------------------------------------------------------------------------------------------------------|----------------|------------------|
| AstraZeneca                                                                                                                                                                     | Expert Witness | Self             |
| <b>Category:</b> Expert Witness<br><b>Description:</b> Speaker at the prevention symposium in vulnerable patients.,<br><b>Additional Information:</b>                           |                |                  |
| AstraZeneca                                                                                                                                                                     | Other          | Self             |
| <b>Category:</b> Other<br><b>Description:</b> Speaker: 1st northern regional scientific conference on Pulmonology and Thoracic Surgery,<br><b>Additional Information:</b>       |                |                  |
| AstraZeneca                                                                                                                                                                     | Other          | Self             |
| <b>Category:</b> Other<br><b>Description:</b> Speaker at the symposium new approaches to the prevention of COVID 19 in vulnerable populations<br><b>Additional Information:</b> |                |                  |
| AstraZeneca                                                                                                                                                                     | Expert Witness | Self             |
| <b>Category:</b> Expert Witness<br><b>Description:</b> Speaker at the Respiratory Summit.<br><b>Additional Information:</b>                                                     |                |                  |
| AstraZeneca                                                                                                                                                                     | Other          | Self             |
| <b>Category:</b> Other<br><b>Description:</b> Speaker at the conference vulnerable populations in the era of COVID 19 in Mexico.<br><b>Additional Information:</b>              |                |                  |
| AstraZeneca                                                                                                                                                                     | Other          | Self             |
| <b>Category:</b> Other<br><b>Description:</b> Speaker at the HUMANZ meeting<br><b>Additional Information:</b>                                                                   |                |                  |
| AstraZeneca                                                                                                                                                                     | Other          | Self             |
| <b>Category:</b> Other<br><b>Description:</b> Speaker during the advisory board, at IDWeek 2022<br><b>Additional Information:</b>                                               |                |                  |
| Instituto Científico Pfizer                                                                                                                                                     | Other          | Self             |

| Entity                                                                                                                                                             | Type  | Interest Held By |
|--------------------------------------------------------------------------------------------------------------------------------------------------------------------|-------|------------------|
| <b>Category:</b> Other<br><b>Description:</b> Speaker in advisory board Asia: An overview of COVID-19 treatment landscape.<br><b>Additional Information:</b>       |       |                  |
| Instituto Científico Pfizer                                                                                                                                        | Other | Self             |
| <b>Category:</b> Other<br><b>Description:</b> Advisory Board Speaker: COVID-19 Outpatient Therapies<br><b>Additional Information:</b>                              |       |                  |
| Instituto Científico Pfizer                                                                                                                                        | Other | Self             |
| <b>Category:</b> Other<br><b>Description:</b> Speaker in advisory board LATAM: An overview of COVID-19 treatment landscape.<br><b>Additional Information:</b>      |       |                  |
| Instituto Científico Pfizer                                                                                                                                        | Other | Self             |
| <b>Category:</b> Other<br><b>Description:</b> Speaker at the Advisory Board: New antiviral therapies for covid-19<br><b>Additional Information:</b>                |       |                  |
| Instituto Científico Pfizer                                                                                                                                        | Other | Self             |
| <b>Category:</b> Other<br><b>Description:</b> Speaker on the Paxlovid tour<br><b>Additional Information:</b>                                                       |       |                  |
| Instituto Científico Pfizer                                                                                                                                        | Other | Self             |
| <b>Category:</b> Other<br><b>Description:</b> Advisory Board Speaker: Treatment of Outpatients with COVID-19<br><b>Additional Information:</b>                     |       |                  |
| Instituto Científico Pfizer                                                                                                                                        | Other | Self             |
| <b>Category:</b> Other<br><b>Description:</b> Speaker at the Advisory Board: Clinical guidelines for the management of Paxlovid.<br><b>Additional Information:</b> |       |                  |
| Instituto Científico Pfizer                                                                                                                                        | Other | Self             |
| <b>Category:</b> Other<br><b>Description:</b> Speaker in advisory board Europe: An overview of COVID-19 treatment landscape<br><b>Additional Information:</b>      |       |                  |
| Regeneron Pharmaceuticals                                                                                                                                          | Other | Self             |
| <b>Category:</b> Other<br><b>Description:</b> Speaker at the conference: innovative therapies in COVID-19.<br><b>Additional Information:</b>                       |       |                  |

## Additional Questions

**1. Are there other relationships or activities that readers could perceive to have influenced, or that give the appearance of potentially influencing, what you wrote in the submitted work?**

No.

**2. What is the manuscript title?**

Nirmatrelvir for Vaccinated/Unvaccinated, Outpatient Adults with Covid-19

**3. Are you the corresponding author?**

No.

## Certification

I certify that the information provided in this disclosure is complete and accurate.

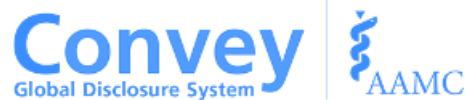

# Wayne Wisemandle

**Discloser Identifier:** 1057410

**Disclosure Purpose:** 23-09003 Hammond

## Summary of Interests

### Company or Organization

| Entity                                 | Type       | Interest Held By                                                                                           |
|----------------------------------------|------------|------------------------------------------------------------------------------------------------------------|
| Pfizer Inc.                            | Employment | Self                                                                                                       |
| <b>Title:</b> Sr. Director, Statistics |            | <b>Position Description:</b> Lead a team of statisticians to design, analyze and report on clinical trials |
| <b>Additional Information:</b>         |            |                                                                                                            |
| Pfizer Inc.                            | Stock      | Self                                                                                                       |
| <b>Additional Information:</b>         |            |                                                                                                            |

## Additional Questions

1. **Are there other relationships or activities that readers could perceive to have influenced, or that give the appearance of potentially influencing, what you wrote in the submitted work?**

No.

2. **What is the manuscript title?**

Nirmatrelvir for Vaccinated/Unvaccinated, Outpatient Adults with Covid-19

3. **Are you the corresponding author?**

No.

## Certification

I certify that the information provided in this disclosure is complete and accurate.

Carla Yunis

**Discloser Identifier:** 738018

**Disclosure Purpose:** 23-09003 Hammond

## Summary of Interests

### Company or Organization

| Entity                                                                   | Type       | Interest Held By             |
|--------------------------------------------------------------------------|------------|------------------------------|
| Pfizer                                                                   | Employment | Self                         |
| <b>Title:</b> Clinical Operations Head<br><b>Additional Information:</b> |            | <b>Position Description:</b> |

## Additional Questions

1. **Are there other relationships or activities that readers could perceive to have influenced, or that give the appearance of potentially influencing, what you wrote in the submitted work?**

No.

2. **What is the manuscript title?**

Nirmatrelvir for Vaccinated/Unvaccinated, Outpatient Adults with Covid-19

3. **Are you the corresponding author?**

No.

## Certification

I certify that the information provided in this disclosure is complete and accurate.
